# Supplementary material
Source: Research Square preprint supplement (doi:10.21203/rs.3.rs-8742634/v1)
Supplement: Supplementary file 1 [file 83cc5ab8468e7855f17eab67.docx]

**Supplementary Table 1.** NLM Sequence Read Archive accession numbers for validated RNA sequencing datasets generated in this study.

| 2025 | **Karunakaran P**, RNA-Based Transcriptomic Fusion Gene Analysis in Poorly Differentiated Thyroid Carcinoma; PRJNA1072828; BioSample: 2, SRA: 2; SUB14200545; 01-03-2025 |
| --- | --- |
| 2024 | **Karunakaran P**, The RNA-Based Transcriptomic Analysis of Fusion Genes in Anaplastic/Undifferentiated Thyroid Carcinoma; PRJNA1072837; BioSample: 1, SRA: 1; SUB14202022; 04-04-2024 |
| 2024 | **Karunakaran P**, RNA-based Fusion Gene Analysis of Medullary Thyroid Cancer; PRJNA954389; BioSample: 1, SRA: 1; SUB13058964; 02-05-2024 |
| 2024 | **Karunakaran P**, RNA-based Gene-Fusion Analysis in Follicular Nodular Disease; PRJNA955922; BioSample: 8, SRA: 8; SUB13082009; 02-05-2024 |
| 2024 | **Karunakaran P**, RNA-based Transcriptomic Gene Fusion Analysis in Hashimoto's Thyroiditis; PRJNA956285; BioSample: 12, SRA: 12; SUB13085764; 02-05-2024 |
| 2024 | **Karunakaran P**, RNA-based Gene Fusion Analysis in Hyperthyroidism; PRJNA956540; BioSample: 11, SRA: 11; SUB13087513; 02-05-2024 |
| 2024 | **Karunakaran P**, RNA-Based Transcriptomic Fusion Genes Analysis of Colloid Goitre Using Next Generation Sequencing; PRJNA960806; BioSample: 9, SRA: 9; SUB13150606; 02-05-2024 |
| 2024 | **Karunakaran P**, RNA-Based Fusion Gene Analysis of Adenomatous Goiter Using Next Generation Sequencing; PRJNA960692; BioSample: 10, SRA: 10; SUB13150388; 01-05-2024 |
| 2024 | **Karunakaran P**, RNA-Based Transcriptomic Fusion Genes Analysis in Papillary Thyroid Carcinoma Using Next Generation Sequencing; PRJNA960704; BioSample: 10, SRA: 10; SUB13150459; 02-05-2024 |
| 2024 | **Karunakaran P**, Molecular Profiling of Patients with Hyperthyroidism; PRJNA949115; BioSample: 12, SRA: 12; SUB12991546; 31-03-2024 |
| 2024 | **Karunakaran P**, Genomic Profiling of Adenomatous Goitre using Next Generation Sequencing; PRJNA950074; BioSample: 21, SRA: 20; SUB12998553; 31-03-2024 |
| 2024 | **Karunakaran P**, DNA Sequencing and RNA Fusion Gene Analysis in Follicular Thyroid Cancer; PRJNA901638; BioSample: 2, SRA: 4; SUB12284644; 05-01-2024 |
| 2023 | **Karunakaran P**, Unique Mutations in Papillary Thyroid Carcinoma by Next Generation Sequencing; PRJNA901643; BioSample: 16, SRA: 16; SUB12270374; 01-12-2023 |
